# Supplementary material for: Recyclability of CsPbBr3 quantum dot glass nanocomposites for their long-standing use in white LEDs
Source: Royal Society of Chemistry journal article supplement (doi:10.1039/d2tc03568e), 2022-01-01
Supplement: d2tc03568e1.pdf [file d2tc03568e1.pdf]

## Recyclability of CsPbBr<sub>3</sub> Quantum Dot Glass Nanocomposites for Their Long-Standing Use in White LEDs

Naji Vahedigharehchopogh <sup>a, #</sup>, Erdinç Erol <sup>a, b, #</sup>, Orhan Kıbrıslı <sup>a</sup>, Aziz Genç <sup>c</sup>, Miray Çelikkilek Ersundu <sup>a, \*</sup>, Ali Erçin Ersundu <sup>a, \*</sup>

<sup>a</sup> Yıldız Technical University, Faculty of Chemical and Metallurgical Engineering, Department of Metallurgical and Materials Engineering, Glass Research and Development Laboratory, Istanbul, 34220, Turkey

<sup>b</sup> Manisa Celal Bayar University, Department of Metallurgical and Materials Engineering, Muradiye, Manisa, Turkey

<sup>c</sup> İzmir Institute of Technology, Faculty of Engineering, Department of Materials Science and Engineering, İzmir, 35430, Turkey

### 1. Supplementary Figures

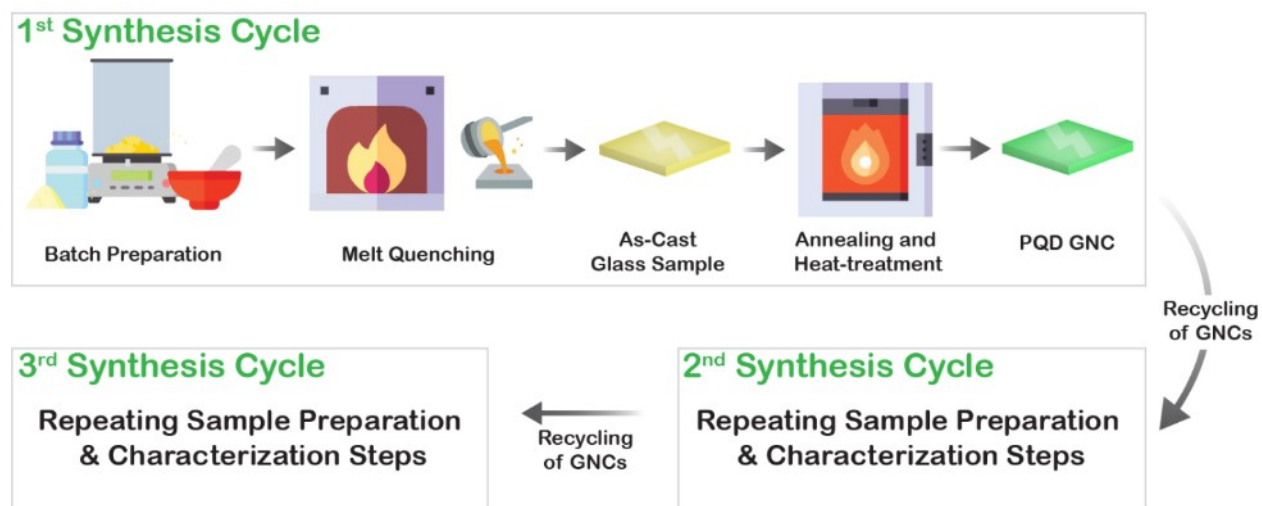

**Fig. S1** Schematic illustration of applied synthesis and recycling processes for PQD GNCs

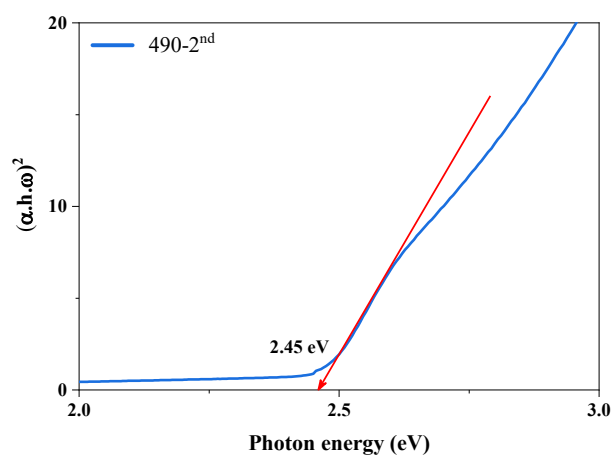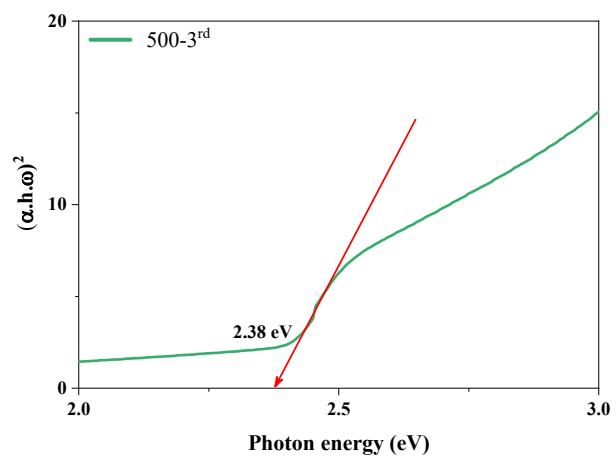

**Fig. S2** Tauc plots of recycled PQD GNCs

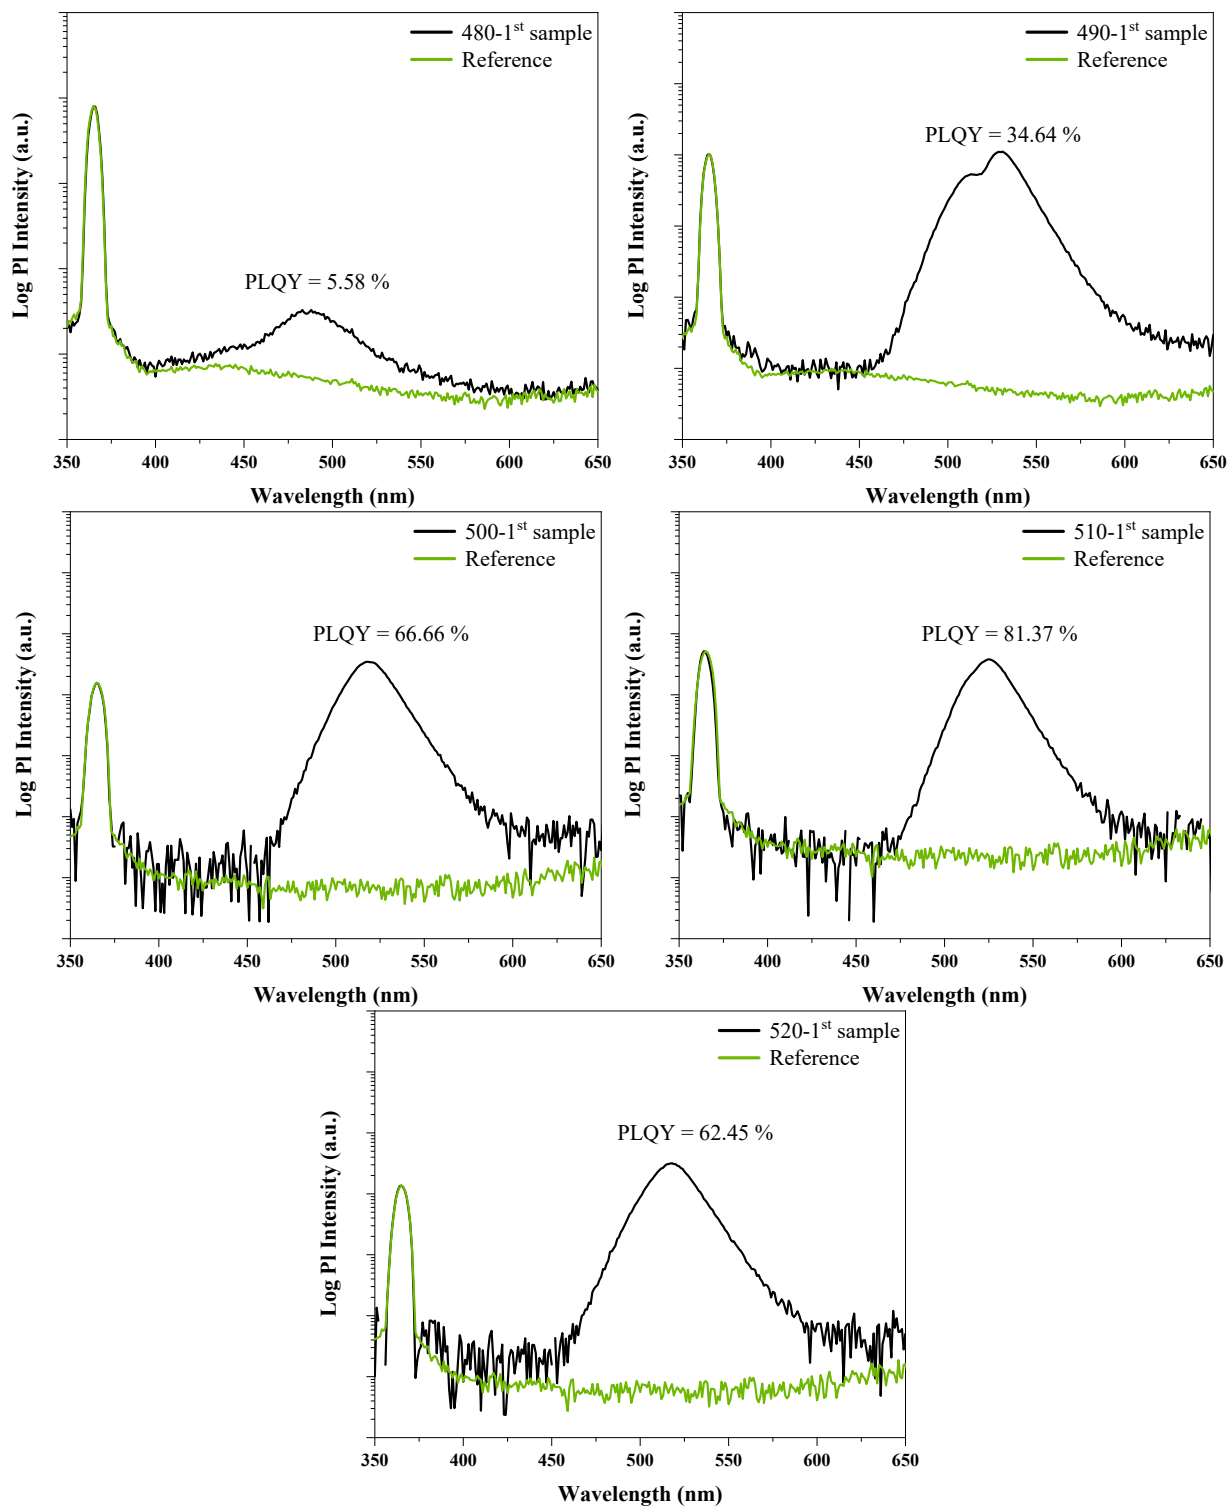

**Fig. S3** PLQY mapping of PQC GNCs from the 1<sup>st</sup> synthesis cycle. (Samples are excited at 360 nm and PLQY values are indicated in each plot.)

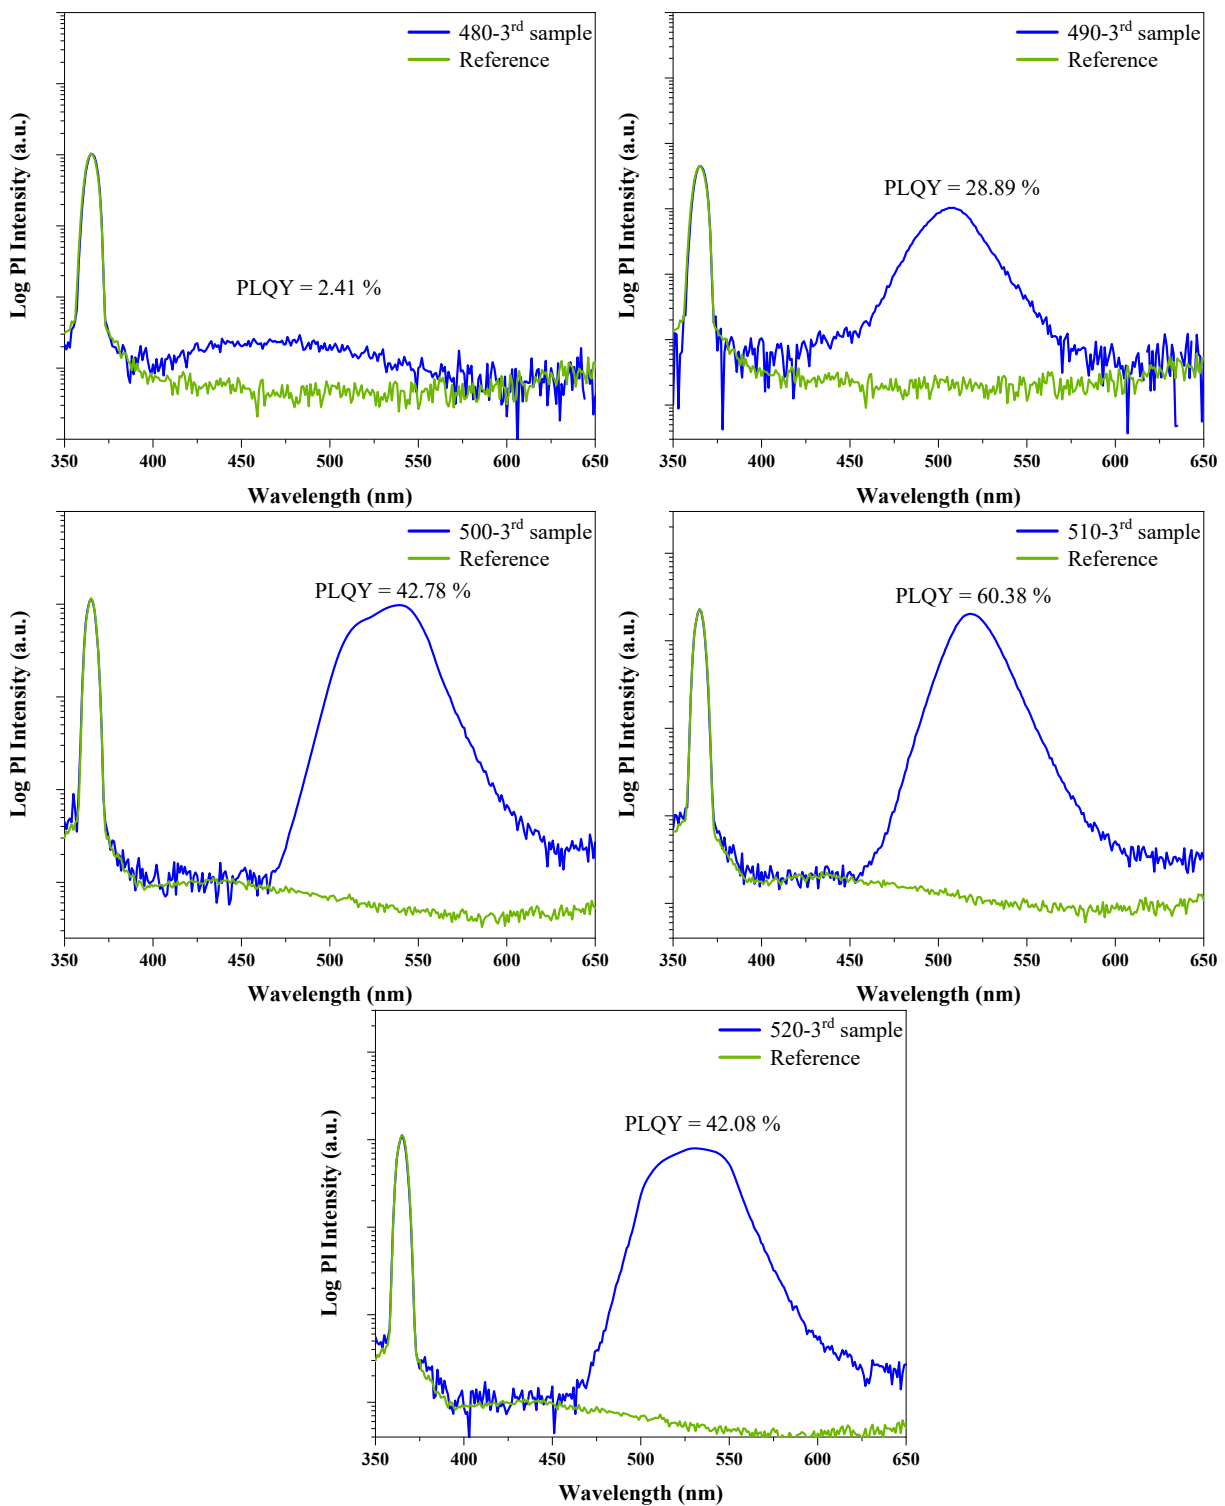

**Fig. S4** PLQY mapping of PQC GNCs from the 3<sup>rd</sup> synthesis cycle. (Samples are excited at 360 nm and PLQY values are indicated in each plot.)

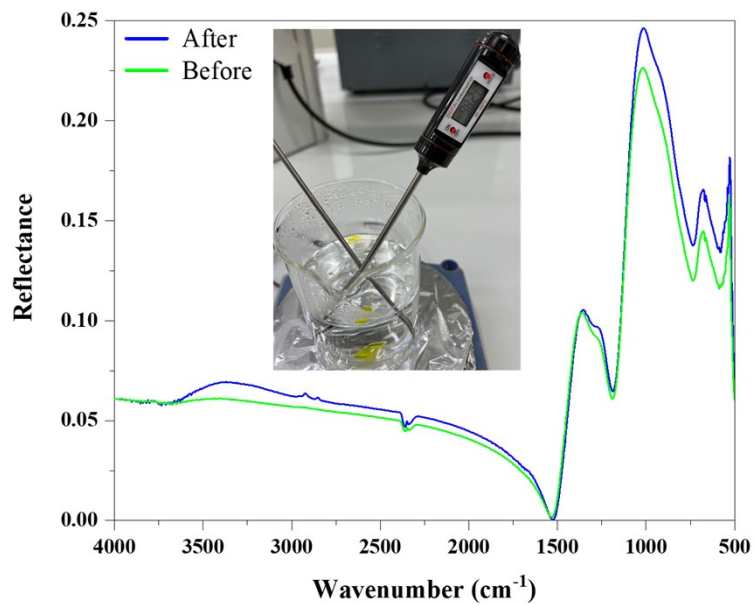

**Fig. S5** FTIR spectrum of 510-3<sup>rd</sup> sample before and after immersing in boiling water for 4 h (inset shows the temperature during the boiling process)

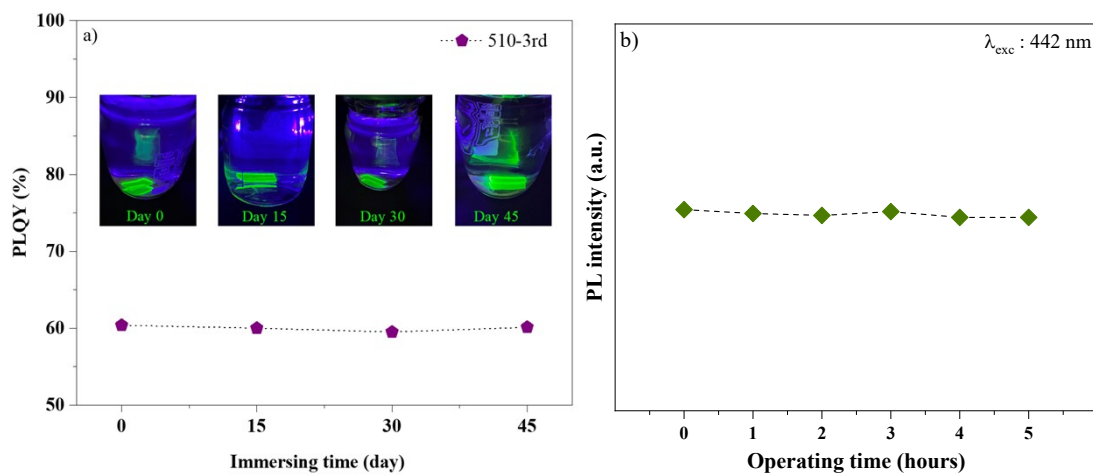

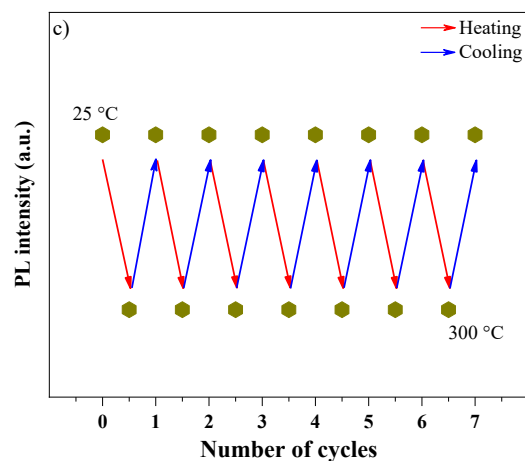

**Fig. S6** (a) Chemical stability test by immersion in water for 45 days (b) Photostability test under 442 nm laser operating at 500 mW (c) heating-cooling cycle test from 25 °C to 300 °C

## 2. Supplementary Tables

**Table S1** Nominal and final chemical compositions of as-cast samples for the first and third synthesis cycle

| Element | Nominal composition (at%) | Final compositions (at%)        |                                 |
|---------|---------------------------|---------------------------------|---------------------------------|
|         |                           | 1 <sup>st</sup> synthesis cycle | 3 <sup>rd</sup> synthesis cycle |
| Si      | 10.08                     | 9.38                            | 8.83                            |
| B       | 17.29                     | 17.29*                          | 17.29*                          |
| Zn      | 3.45                      | 3.49                            | 3.61                            |
| Ca      | 1.44                      | 1.45                            | 1.64                            |
| Al      | 1.15                      | 1.15*                           | 1.15*                           |
| Na      | 3.45                      | 3.17                            | 2.94                            |
| Cs      | 4.03                      | 3.62                            | 3.39                            |
| Pb      | 1.72                      | 1.65                            | 1.58                            |
| Br      | 2.59                      | 2.15                            | 1.75                            |
| O       | 54                        | 56.65                           | 57.82                           |

\*: Compositions of these elements are taken constant as in the nominal glass composition

**Table S2** CIE color coordinates of PQD GNCs

| Synthesis Cycle                 | Sample              | x      | y      |
|---------------------------------|---------------------|--------|--------|
| 1 <sup>st</sup> synthesis cycle | 480-1 <sup>st</sup> | 0.1196 | 0.2139 |
|                                 | 490-1 <sup>st</sup> | 0.1299 | 0.7856 |
|                                 | 500-1 <sup>st</sup> | 0.2069 | 0.7620 |
|                                 | 510-1 <sup>st</sup> | 0.2427 | 0.7371 |
|                                 | 520-1 <sup>st</sup> | 0.2598 | 0.7243 |
| 2 <sup>nd</sup> synthesis cycle | 480-2 <sup>nd</sup> | 0.1339 | 0.1940 |
|                                 | 490-2 <sup>nd</sup> | 0.0860 | 0.4162 |
|                                 | 500-2 <sup>nd</sup> | 0.0638 | 0.5527 |
|                                 | 510-2 <sup>nd</sup> | 0.0817 | 0.7348 |
|                                 | 520-2 <sup>nd</sup> | 0.0974 | 0.7337 |
| 3 <sup>rd</sup> synthesis cycle | 480-3 <sup>rd</sup> | 0.1298 | 0.1890 |
|                                 | 490-3 <sup>rd</sup> | 0.1084 | 0.3226 |
|                                 | 500-3 <sup>rd</sup> | 0.0679 | 0.4884 |
|                                 | 510-3 <sup>rd</sup> | 0.0589 | 0.5957 |
|                                 | 520-3 <sup>rd</sup> | 0.0888 | 0.7369 |

**Table S3** Observed FTIR band positions for 510-3<sup>rd</sup> sample

| Wavenumber (cm <sup>-1</sup> ) | Band assignments                                                                                          |
|--------------------------------|-----------------------------------------------------------------------------------------------------------|
| 680                            | bending vibrations of bridging oxygen in BO <sub>3</sub> units <sup>1,2</sup>                             |
| 918                            | B–O stretching vibrations in BO <sub>4</sub> units and also stretching frequency of Si–O–B <sup>1,3</sup> |
| 1023                           | B–O stretching vibrations in BO <sub>4</sub> units <sup>3</sup>                                           |
| 1260                           | B–O stretching vibrations in BO <sub>3</sub> units <sup>4</sup>                                           |
| 1352                           | B–O stretching vibrations in BO <sub>3</sub> units <sup>4</sup>                                           |
| 3200-3600 (broad)              | Molecular water <sup>1,5,6</sup>                                                                          |

**REFERENCES**

1. J. Zhong, X. Ma, H. Lu, X. Wang, S. Zhang and W. Xiang, *J. Alloys Compd.*, 2014, **607**, 177-182.
2. P. Muralidharan, M. Venkateswarlu and N. Satyanarayana, *Mater. Chem. Phys.*, 2004, **88**, 138-144.
3. A. E. Ersundu, M. Çelikbilek and S. Aydin, *J. Non-Cryst. Solids*, 2012, **358**, 641-647.
4. T. G. V. M. Rao, A. Rupesh Kumar, K. Neeraja, N. Veeraiah and M. Rami Reddy, *J. Alloys Compd.*, 2013, **557**, 209-217.
5. C. Gautam, A. K. Yadav and A. K. Singh, *ISRN Ceramics*, 2012, **2012**, 428497.
6. A. Bobrowski, B. Hutera, A. Kmita, D. Drożyński and M. J. M. Starowicz, 2012, **51**, 477-480.
